# Supplementary material for: The enzymatic nature of fungal bioluminescence
Source: Royal Society of Chemistry journal article supplement (doi:10.1039/b908982a), 2009-07-30
Supplement: b908982a.pdf [file b908982a.pdf]

## Tables

**Table 1S. Effect of the cold and hot concentrations on the decay rate constants ( $k_{\text{obs}1}$  and  $k_{\text{obs}2}$ ), the rise rate constant ( $k_{\text{obs}3}$ ) and the relative light intensity integrals ( $I_{\text{total}}$ )<sup>a</sup>**

| Hot extract <sup>b</sup> |                                                          |                                                          |                                                          |                    | Cold extract <sup>c</sup> |                                                          |                                                          |                                                          |                    |
|--------------------------|----------------------------------------------------------|----------------------------------------------------------|----------------------------------------------------------|--------------------|---------------------------|----------------------------------------------------------|----------------------------------------------------------|----------------------------------------------------------|--------------------|
| Volume (μL)              | $k_{\text{obs}1} \times 10^{-3} \text{ (s}^{-1}\text{)}$ | $k_{\text{obs}2} \times 10^{-3} \text{ (s}^{-1}\text{)}$ | $k_{\text{obs}3} \times 10^{-2} \text{ (s}^{-1}\text{)}$ | $I_{\text{total}}$ | Volume (μL)               | $k_{\text{obs}1} \times 10^{-3} \text{ (s}^{-1}\text{)}$ | $k_{\text{obs}2} \times 10^{-3} \text{ (s}^{-1}\text{)}$ | $k_{\text{obs}3} \times 10^{-3} \text{ (s}^{-1}\text{)}$ | $I_{\text{total}}$ |
| 2.5                      | 4.9 ± 0.5                                                | 0.8 ± 0.2                                                | 4.6 ± 0.2                                                | 1.0                | 25                        | 2.3 ± 0.3                                                | -                                                        | 8.5 ± 0.5                                                | 1.0                |
| 5.0                      | 5.5 ± 0.4                                                | 1.4 ± 0.2                                                | 4.2 ± 0.1                                                | 1.9                | 50                        | 2.5 ± 0.1                                                | -                                                        | 14.9 ± 0.4                                               | 1.5                |
| 10                       | 4.9 ± 0.3                                                | 1.2 ± 0.3                                                | 4.0 ± 0.1                                                | 2.8                | 100                       | 4.0 ± 0.7                                                | 1.6 ± 0.5                                                | 26.1 ± 0.5                                               | 1.3                |
| 25                       | 5.6 ± 0.3                                                | 2.0 ± 0.2                                                | 3.8 ± 0.1                                                | 5.3                | 200                       | 6.4 ± 0.3                                                | 2.6 ± 0.2                                                | 32.5 ± 0.4                                               | 1.6                |
| 50                       | 5.3 ± 0.2                                                | 1.8 ± 0.3                                                | 3.1 ± 0.1                                                | 8.2                |                           |                                                          |                                                          |                                                          |                    |

<sup>a</sup> Curves were fitted using the expression  $I = (a_1 e^{-k_{\text{obs}1} t} + a_2 e^{-k_{\text{obs}2} t}) - a_3 e^{-k_{\text{obs}3} t}$  as implemented in software Microcal Origin<sup>®</sup> 6.0.

<sup>b</sup> Obtained from 20 mg of *G. viridilucens* dried mycelium in 1.5 mL of boiling extraction buffer. [NADPH] = 100 μM, [BSA] = 143 mgL<sup>-1</sup>, cold extract: 200 μL.

<sup>c</sup> Obtained from 80 mg of *G. viridilucens* dried mycelium in 4.0 mL of cold extraction buffer. [NADPH] = 100 μM, [BSA] = 140 mgL<sup>-1</sup>, hot extract: 50 μL.

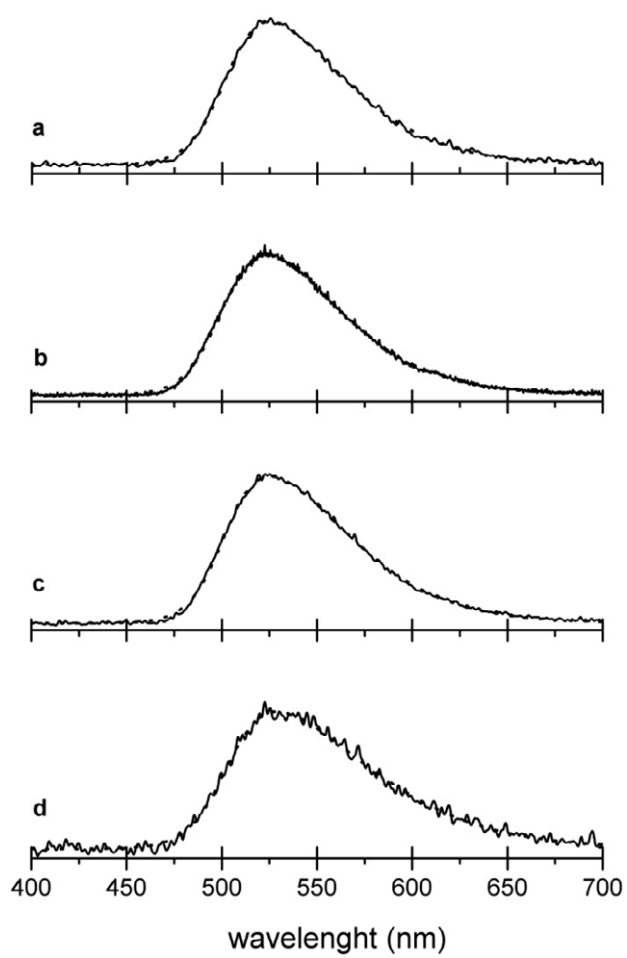

**Fig. 1S.** *In vivo* BL spectra obtained from *M. fera* (a), *M. asterina* (b), *M. lucentipes* (c), and *G. viridilucens* (d) fruiting bodies.

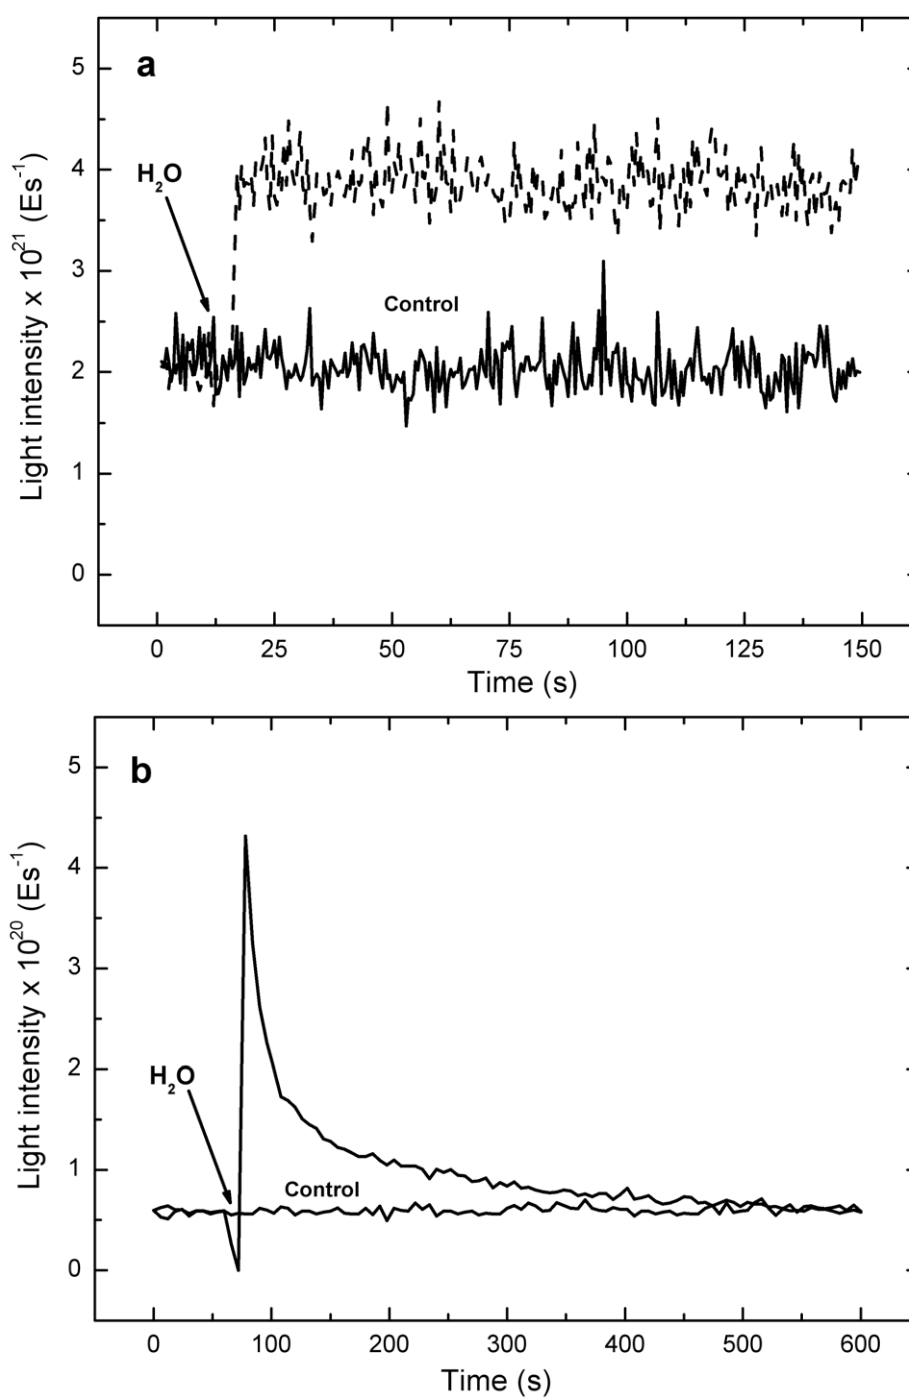

**Fig. 2S.** BL emission recorded in the tube luminometer from 20 mg of *G. viridilucens* dried cultivated mycelium in the absence (dotted line) and in the presence of water (a), and 20 mg of powdered dried mycelium of the same species in water (b). **Controls: (a) 20 mg of *G. viridilucens* integer dried mycelium, (b) 20 mg of *G. viridilucens* powdered dried mycelium.**
